1 **Association between ocular biometrical parameters and diabetic retinopathy in**  
2 **Chinese adults with type 2 diabetes mellitus**

3

4 **Running title:** Ocular biometry parameters and DR

5

6 **Authors:**

7 Lanhua Wang, MD, PhD<sup>1\*</sup>, Sen Liu, MBBS<sup>1,2\*</sup>, Wei Wang, MD, PhD<sup>1#</sup>, Miao He,

8 MD, PhD<sup>3</sup>, Zhiyin Mo, BSc<sup>1</sup>, Xia Gong, MD<sup>1</sup>, Kun Xiong, MD<sup>1</sup>, Yuting Li, MD,

9 MPH<sup>1</sup>, Wenyong Huang, MD, PhD<sup>2#</sup>

10 \*Co-first authors

11 #Co-correspondence authors.

12

13 **Affiliation and institute**

14 1. Zhongshan Ophthalmic Center, State Key Laboratory of Ophthalmology, Sun

15 Yat-Sen University, Guangzhou, People's Republic of China

16 2. School of Medicine, Sun Yat-sen University Guangzhou, China.

17 3. Department of Ophthalmology, Guangdong General Hospital, Guangdong

18 Academy of Medical Sciences, Guangzhou, People's Republic of China.

19

20 **Corresponding author:**

21 Wei Wang, MD&PhD, Zhongshan Ophthalmic Center, State Key Laboratory of

22 Ophthalmology, Sun Yat-sen University, 54S.Xianlie Road, Guangzhou, China

23 510060, Email: zoc\_wangwei@yahoo.com

24 Wenyong Huang, MD&PhD, Zhongshan Ophthalmic Center, State Key Laboratory of

25 Ophthalmology, Sun Yat-sen University, 54S.Xianlie Road, Guangzhou, China

26 510060, Email: andyhwyz@aliyun.com

27

28 **Word count:** 2794

29 **Tables:** 4

30 **Figures:** 1

31 **Abstract**

32 **Purpose:** To investigate the association between ocular biometrical parameters and  
33 diabetic retinopathy (DR) in ocular treatment naive patients with diabetes.

34 **Methods:** This cross-sectional study recruited type 2 diabetes mellitus patients with  
35 no history of ocular treatment in Guangzhou, China. The ocular biometrical  
36 parameters were obtained by Lenstar, including corneal diameter, central corneal  
37 thickness (CCT), corneal curvature (CC), anterior chamber depth (ACD), lens  
38 thickness (LT), and axial length (AL). The lens power and axial length-to-cornea  
39 radius ratio (AL/CR ratio) were calculated. Spherical equivalent (SE) was determined  
40 by auto-refraction after pupil dilation. Multivariate logistic regression analyses were  
41 performed to explore the associations of ocular biometry with any DR and vision  
42 threatening DR (VTDR).

43 **Results:** A total of 1838 patients were included in the final analysis, involving 145  
44 5(79.2%) patients without DR and 383(20.8%) patients with DR. After adjusting  
45 confounding factors, any DR was independently associated with AL (OR = 0.84 per 1  
46 mm increase, 95%CI: 0.74, 0.94), lens power (OR = 0.9951 per 1 D increase, 95%CI:  
47 0.9904, 0.9998), and AL/CR ratio (OR = 0.26 per 1 increase, 95%CI: 0.10-0.70).  
48 Similarly, the presence of VTDR was independently related to AL (OR = 0.67 per 1  
49 mm increase, 95%CI: 0.54-0.85), lens power (OR = 0.99 per 1 D increase, 95%CI:  
50 0.98, 0.997), and AL/CR ratio (OR = 0.04 per 1 increase, 95%CI: 0.01, 0.25). The CC,  
51 corneal diameter, and refractive status were not significantly correlated with presence  
52 of DR or VTDR.

53 **Conclusion:** Longer AL, deeper ACD, higher lens power, and higher AL/CR ratio  
54 may be protective factors against DR. Considering the high prevalence of myopia in  
55 the Chinese juvenile population, it is worth paying attention to how the incidence of  
56 DR in this generation may change over time.

57

58 **Keywords:** diabetic retinopathy; myopia; axial length; AL/CR ratio; ocular biometry

59

60

61 **Introduction**

62 Diabetic retinopathy (DR) is a common cause of visual impairment in the  
63 working-age population.<sup>1</sup> However, the pathogenesis of DR still remains unclear.  
64 Systemic risk factors for DR (e.g. course of diabetes, blood glucose and blood  
65 pressure) have broadly drawn the attention of investigators; however, few studies  
66 have focused on ocular risk factors.<sup>2</sup> Prevalence of myopia increased significantly in  
67 the last decades globally, especially become epidemic in some Asian regions.<sup>3</sup> It was  
68 found however in clinical practice that diabetic patients with myopia are less likely to  
69 suffer from severe DR.<sup>4</sup> A small number of clinical studies and epidemiological  
70 studies have suggested that myopia could be a protective factor against DR; however,  
71 this conclusion remains controversial.<sup>4-7</sup>

72  
73 Whether the ocular structure or the refracting media, or both, contribute to the  
74 protective relationship is still under debate. Several studies have evaluated the  
75 association of axial length (AL), myopia and refracting media in cases of DR.<sup>6-10</sup>  
76 However, the investigators have not yet reached a consensus on the implications of  
77 these results. Similarly, the association of the anterior chamber depth (ACD), lens,  
78 cornea curvature (CC) and AL/CR ratio with the risk of DR was elusive.<sup>9, 11</sup>  
79 Furthermore, the majority of previous studies were conducted no further subdivision  
80 to exclude the influence of potential confounding factors including age, sex,  
81 glycaemic level, and history of cataract surgery, which may bias the results.<sup>12</sup> Thus,  
82 the which component of the ocular biometrical parameter contribute to the association  
83 between myopia and DR remains unclear.

84  
85 The influence of myopia and ocular biometry parameters on the occurrence and  
86 progression of DR needs further clarification; therefore, the objective of this study  
87 was to investigate the association between ocular biometrical parameters and DR  
88 assessed in a large sample size of patients with type 2 diabetes mellitus (T2DM).

89

90 **Methods**

## 91 **Subjects**

92 This cross-sectional study was performed at Zhongshan Ophthalmic Centre (ZOC),  
93 Sun Yat-sen University, China. The protocol of the study was approved by the  
94 Institute Ethics Committee of ZOC and the study was performed according to the  
95 guidelines of the Helsinki Declaration. All subjects gave their informed written  
96 consent prior to enrolling in the study. Individuals aged 30 to 85 who were diagnosed  
97 with T2DM without ocular treatment history were recruited from the local  
98 government diabetes registry system. Exclusion criteria were as follows: (1) history of  
99 serious systemic diseases except for diabetes, such as serious cardiovascular and  
100 cerebrovascular diseases, malignant tumour, renal diseases; (2) history of systemic  
101 surgery such as coronary artery bypass graft, thrombolytic therapy and renal  
102 transplant; (3) presence of cognitive impairment, mental disorders, or inability to  
103 complete the questionnaire and examination; (4) history of ocular surgical  
104 interventions, such as retinal laser, intraocular injection, glaucoma surgery, cataract  
105 surgery, or laser myopia surgery; and (5) abnormal refractive media (severe cataract,  
106 corneal ulcer, pterygium, or corneal turbidity), poor fixation and other conditions  
107 resulting in poor quality of the fundus images.

108

## 109 **Procedures and definitions**

110 A detailed questionnaire was used to collect the subjects' demographic data, lifestyle  
111 risk factors, medical history and medication history. Outpatient medical records were  
112 reviewed to confirm details of medical history. All subjects underwent complete  
113 ocular examinations, including visual acuity, intraocular pressure (IOP), slit lamp  
114 examination, fundus examination, auto refraction, ocular biometric measurement,  
115 fundus photography, OCT and OCTA. The right eye was examined first in all eye  
116 examinations. Best corrected vision acuity (BCVA) were measured using ETDRS  
117 LogMAR E charts (Precision Vision, Villa Park, Illinois, USA) at a distance of 4 m.  
118 The IOP was measured with a noncontact tonometer (CT-1 Computerized Tonometer,  
119 Topcon Ltd., Topcon). The anterior and posterior segments were examined with a slit  
120 lamp bio-microscope (BQ-900, Haag-Streit, Switzerland) and a 90 D indirect

121 ophthalmoscope.

122

123 Refraction errors were measured with an auto refractometer (KR-8800; Topcon,  
124 Japan), and spherical equivalent (SE) was calculated by adding half of the  
125 cylindrical power to the spherical power. Emmetropia was defined as SE between -0.5  
126 and 0.5 D. Myopia, mild myopia, moderate myopia, and high myopia were defined as  
127 SE < -0.5 D, -0.5 to -3 D, -3 to -6 D, and < -6 D, respectively. Hyperopia was defined  
128 as SE > 0.5 D.<sup>13</sup>

129

130 Ocular biometric parameters were measured using Lenstar LS900 (Haag-Streit AG,  
131 Koeniz, Switzerland), including central corneal thickness (CCT), corneal diameter,  
132 corneal curvature (CC), anterior chamber depth (ACD), lens thickness (LT), axial  
133 length (AL). The axial length-to-corneal radius ratio (AL/CR ratio) was defined as the  
134 AL divided by the mean radius of the corneal curvature. The lens power was  
135 calculated according to the modified Bennette-Rabbetts formula.<sup>14</sup>

136

137 Pupil dilation was performed with instillation of 0.5% tropicamide plus 0.5%  
138 phenylephrine eye drops. Once the pupils were fully dilated, standardised 7-field  
139 colour retinal photographs were taken, according to criteria from the Early Treatment  
140 Diabetic Retinopathy Study (ETDRS), using a digital fundus camera (Canon CR-2,  
141 Tokyo, Japan). Diabetic retinopathy (DR) was graded according to the American  
142 Academy of Ophthalmology (AAO) International Clinical Diabetic Retinopathy  
143 Disease Severity Scale by 2 ophthalmologists.<sup>15</sup> Any DR was defined as presence of  
144 non-proliferative DR (NPDR), proliferative DR (PDR), diabetic macular oedema  
145 (DME), or any combination; and vision threatened DR (VTDR) was defined as  
146 presence of PDR and / or DME.<sup>16</sup>

147

148 Systolic and diastolic blood pressure were measured using a blood pressure monitor  
149 (HBP-9020; OMRON, Osaka, Japan). Weight and height were measured using an  
150 automatic weight and height scale (HNN-318; OMRON), with subjects standing on

151 the scale with light clothes and no shoes on. All examinations were performed in  
152 compliance with the standardisation of procedures by an experienced nurse. Body  
153 mass index (BMI) was calculated as the weight (kg) divided by the square of height  
154 (m). Fasting (8 hours) venous blood samples were collected and sent for analysis of  
155 serum creatinine (Scr), glycosylated haemoglobin (HbA1c), total cholesterol (TC),  
156 high-density lipoprotein cholesterol (HDL-c), low-density lipoprotein cholesterol  
157 (LDL-c), triglyceride (TG), serum uric acid, and urine microalbuminuria (MAU) in  
158 accordance with standardised procedures from a certified laboratory in China.

159

## 160 **Statistical analyses**

161 Only the data of worse eyes were incorporated into the analyses. The  
162 Kolmogorov-Smirnov test was conducted to verify normal distribution. When  
163 normality was confirmed, a t-test was carried out to evaluate the differences in  
164 demographic, systemic and ocular parameters between patients with and without DR.  
165 Next, Pearson's correlation analyses were conducted to assess the associations  
166 between ocular components and HbA1c. Univariate and multivariate logistic  
167 regression analyses were used to explore the correlations of ocular biometry and  
168 diabetic retinopathy in patients with any DR or with (VTDR). Potential confounding  
169 factors were first adjusted for age and sex, and then adjusted for age, sex, course of  
170 T2DM, HbA1c, TC, serum Scr, serum uric acid, BMI and mean blood pressure. We  
171 next investigated the dose-response relationship between AL as a continuous variable  
172 and presence of DR or VTDR. We used restricted cubic splines with 5 knots located at  
173 5%, 27.5%, 50%, 72.55 and 95% of the distribution of AL. All analyses were  
174 performed using Stata Version 14.0 (Stata Corporation, College Station, TX, USA). P  
175 value of  $< 0.05$  was considered statistically significant.

176

## 177 **Results**

### 178 **Demographic and clinical characteristics**

179 A total of 1838 individuals were included in the final statistical analyses, involving  
180 1455 (79.2%) patients without DR and 383 (20.8%) patients with DR. Table 1 shows

181 the demographic and clinical characteristics of the subjects. The mean age of the  
182 subjects was  $64.5 \pm 7.9$  years, 42.7% of them were male, and the duration of diabetes  
183 was  $9.0 \pm 7.9$  years. Of the 1455 patients without DR, 591(40.6%) were male, the  
184 average age was  $64.6 \pm 8.0$  years, and the average course of diabetes was  $8.3 \pm 6.7$  years.  
185 Of the 383 patients with DR, 193(50.4%) were male, the average age was  $64.1 \pm 7.9$  years  
186 and the duration of diabetes was  $11.7 \pm 7.5$  years. Demographically, individuals with  
187 DR had a longer course of diabetes ( $P < 0.001$ ). In terms of systemic and ocular  
188 parameters, subjects with DR also had higher levels of HbA1c, higher mean blood  
189 pressure, higher serum creatinine level, shorter AL, smaller lens power, and smaller  
190 AL/CR ratio (all,  $P < 0.05$ ). There were no differences in age, BMI, total cholesterol,  
191 TG, serum uric acid, CCT, CC, corneal diameter, CCT, ACD and LT (all,  $P > 0.05$ )  
192 between individuals with and without DR.

193

#### 194 **Ocular biometrical components and HbA1c**

195 Table 2 shows the correlation between different ocular biometrical components and  
196 HbA1c levels. Both CCT and lens power were correlated with HbA1c ( $r = 0.0839$ ,  $P =$   
197  $0.0014$  for CCT,  $r = -0.0669$ ,  $P = 0.0051$  for lens power), respectively. Other ocular  
198 parameters showed no correlation with HbA1c, including SE, corneal diameter, CC,  
199 AL, ACD, LT, and AL/CR ratio (all,  $P > 0.05$ ). AL was correlated with all other ocular  
200 biometrical parameters (all,  $P < 0.05$ ).

201

#### 202 **Ocular biometry parameters and DR presence**

203 Table 3 presents the association between ocular biometry and DR after adjusting for  
204 age and sex. The results revealed that AL, LT, lens power, AL/CR ratio, and corneal  
205 diameter were all significantly correlated with DR (all,  $P < 0.05$ ). These correlations  
206 remained statistically significant when considering VTDR as a dependent variable,  
207 with the exception for corneal diameter. However, CC, SE, CCT, and refractive status  
208 persistently showed no correlation (all,  $P > 0.05$ ).

209

210 Table 4 shows the results of further adjusting for other potential confounding factors.  
211 Any DR was independently associated with AL (OR = 0.84 per 1 mm increase,  
212 95%CI: 0.74, 0.94), lens power (OR = 0.9951 per 1 D increase, 95%CI: 0.9904,  
213 0.9998), and AL/CR ratio (OR = 0.26 per 1 increase, 95%CI: 0.10-0.70). The ACD  
214 only showed a negative correlation with DR when taking it as a quantile. The CC,  
215 corneal diameter, and SE were not significantly correlated with presence of DR.  
216 Similarly, the presence of VTDR was significantly related to AL (OR = 0.67 per 1 mm  
217 increase, 95%CI: 0.54-0.85), lens power (OR = 0.99 per 1 D increase, 95%CI: 0.98,  
218 0.997), and AL/CR ratio (OR = 0.04 per 1 increase, 95%CI: 0.01, 0.25) after adjusting  
219 for potential confounding factors. The ACD only showed a negative correlation with  
220 VTDR when taking it as a quantile. The CC, corneal diameter, and refractive status  
221 were not significantly correlated with presence of VTDR. Figure 1 shows the results  
222 of restrictive cubic spline regression analysis evaluating the association between AL  
223 and DR. As expect, the odds ratio for any DR and VTDR all tended to decrease as the  
224 AL lengthened.

225

## 226 **Discussion**

227 The DR and myopia have been increasing in prevalence in recent decades, and both  
228 contribute greatly to visual impairment. Diabetes has been linked to changes in  
229 refractive errors under hyperglycaemic conditions. It was reported that high myopia  
230 may decrease the progression of DR, even though it is associated with serious ocular  
231 complications, such as an increased risk of glaucoma, cataract, and retinal  
232 detachment.<sup>17</sup> Myopia was highly related to the changes of ocular structure, however,  
233 which component of the ocular biometry play the major role in this relationship  
234 remains unclear. This study demonstrated that longer AL, deeper ACD, higher lens  
235 power, and higher AL/CR ratio may all be protective factors against DR and VTDR,  
236 independent of age, sex and other potentially confounding factors. However, the CC,  
237 corneal diameter, LT, refractive status or SE were not associated with DR. To the best  
238 of our knowledge, this is the first study to investigate the ocular components and DR  
239 risk in ocular treatment naïve patients with T2DM in the Chinese population.



240

241 This study found that refractive status was not associated with presence of DR.  
242 Although several small sample clinical and epidemiological studies have suggested  
243 that myopia could be a protective factor against DR, this conclusion remains  
244 controversial. Moss et al. (1994) conducted a cohort study in 1210 young diabetic  
245 patients but reported no correlation of myopia with DR and PDR in univariate  
246 analysis, while it was found that myopia may delay the progression from DR to PDR  
247 after controlling for confounding factors.<sup>18</sup> Furthermore, Dogru et al. (1998) reported  
248 that high myopia may be a protective factor against PDR in a small sample size  
249 retrospective study.<sup>19</sup> Bazzazi et al. (2017) compared two eyes in anisometropia and  
250 verified that high myopia could decrease the incidence of DR, and higher myopia and  
251 longer AL provided a greater protective effect.<sup>20</sup> Several studies based on the Chinese,  
252 Korean, and Singaporean population suggest that myopia is protective against PDR,  
253 but how different myopia status could influence DR was not mentioned in these  
254 studies.<sup>10, 21, 22</sup> A recent longitudinal cohort study demonstrated that refractive status  
255 did not influence the incidence and progression of DR. Consistent with this cohort  
256 study, the present study indicate that different myopia status may not influence DR  
257 risk.

258

259 Longer AL was associated with lower risk for both DR and VTDR, which was  
260 consistent with previous studies. Several population-based studies suggested that AL  
261 played a different role in DR genesis and development in different ethnicities,  
262 although some contradictory results existed in literature.<sup>7-9</sup> A recent cohort study of  
263 Singaporean population demonstrated that the any DR risk decreased by 42% for each  
264 1 mm increase. However, the aforementioned study reported no correlation of AL  
265 with the risk of VTDR.<sup>6</sup> Considering the high prevalence of myopia in the juvenile  
266 population, it is worth keeping a watchful eye on how the incidence of DR in this  
267 generation changes over time. Further longitudinal studies with large sample size are  
268 needed.

269

270 The mechanism of the protective effect of longer AL against DR remains unclear.  
271 Several factors may play a role in this protective phenomenon. First, it was might  
272 related to the pathological alteration caused by AL that increases with the progression  
273 of myopia. This may result in a thinner retina and choroid as well as reduced blood  
274 flow in the retina.<sup>23,24</sup> The low perfusion status relatively decreases the structural  
275 damage of the retinal vessel wall, and also prevents biochemical damage caused by  
276 high glycogen accumulation. Second, oxygen demand is also decreased as the retina  
277 becomes thinner, which alleviates the retina's hypoxic status in diabetic patients.<sup>25</sup>  
278 Third, posterior vitreous detachment (PVD) and synchysis may occur as myopia  
279 progresses, which enables the retina to gain oxygen from the liquefied vitreous body,  
280 resulting in a decreased rate of angiogenesis.<sup>26</sup> Fourth, alterations in cytokines could  
281 also be a potential mechanism, such as vascular endothelial growth factor, pigment  
282 epithelium-derived factor, tumor necrosis factor, erythropoietin, and TGF- $\beta$ .<sup>27</sup> Further  
283 basic studies are warranted to elaborate the underling mechanism.

284

285 Both AL and corneal radius are closely related to the refractive status, with the finding  
286 that AL/CR is linearly dependent on the diopter in populations aged 40 to 64. It was  
287 also reported that AL/CR had a stronger relationship with myopia compared to other  
288 ocular biometry parameters such as AL, ACD and CC. Previous only 1 study have  
289 evaluated the influence of AL/CR ratio and lens power on risk of DR and reported  
290 that both AL/CR and lens power were related to DR, which is consistent with our  
291 results. These findings indicated that lens power and corneal refractive components  
292 also play a role in protective effects of ocular elongation against DR.

293

294 Few studies have investigated the relationship between DR and other biometrical  
295 parameters including CC, ACD, and LT. Pierro et al.<sup>28</sup> found that the LT increased in  
296 patients with insulin-dependent diabetes and the thicker LT was associated with lower  
297 risk for PDR. Another hospital-based study did not observed any correlation between  
298 LT and DR after adjusting confounding factors.<sup>29</sup> The population-based Beijing Eye  
299 Study reported that ACD was not related to presence of DR.<sup>11</sup> We found that the

300 deeper ACD was associated with lower risk of DR in when taking it as a quantile.

301 Thus, further studies are required to verify our finding that a correlation may exist

302 between ACD and lens thickness and DR or VTDR.

303

304 The strengths of our study include the enrolment of only ocular treatment naïve

305 patients with T2DM, a relatively large sample size based on the community

306 population, and fully adjusting for confounding factors. This study also has several

307 limitations. First, the causal relationship between biometry parameters and DR could

308 not be determined due to the inherent features of a cross-sectional study, which need

309 to be verified in a longitudinal study. Second, the subjects in this study were all type 2

310 diabetic patients, and the conclusion of this study needs to be confirmed in further

311 studies with type 1 diabetic patients. Finally, the subjects were all recruited from

312 communities in south China. Considering myopia has an ethnic heterogeneity, the

313 generalisation of the conclusions is limited. Multi-ethnic and multi-centre studies are

314 warranted to verify our findings.

315

### 316 **Conclusions**

317 This study demonstrated that longer AL, deeper ACD, higher lens power, and higher

318 AL/CR ratio may be protective factors against DR, independent of age, sex and other

319 potentially confounding factors. Further studies are warranted to elaborate the

320 potential mechanisms of how the ocular biometry alterations influence DR.

321 Considering the high prevalence of myopia in the juvenile population, it may prove

322 beneficial to pay attention to how the incidence of DR in this generation changes over

323 time.

324

325

326 **Acknowledgments:**

327 This study was supported by the National Natural Science Foundation of China  
328 (81570843; 81530028; 81721003). The funding organizations had no role in the  
329 design or conduct of the study; collection, management, analysis, and interpretation of  
330 the data; preparation, review, or approval of the manuscript; and decision to submit  
331 the manuscript for publication.

332

333 **Author Contributions:** WW and WH had full access to all the data in the study and  
334 take responsibility for the integrity of the data and the accuracy of the data analysis.  
335 Study concept and design: WW, WL, MH, WH. Acquisition, analysis, or  
336 interpretation of data: LS, YL, XG, XK, WL. Drafting of the manuscript: LS, WW.  
337 Critical revision of the manuscript for important intellectual content: All authors.  
338 Statistical analysis: WW. Obtained funding: WH. Administrative, technical, or  
339 material support: MH, WW. Study supervision: MH.

340

341 **Conflict of Interest Disclosures:** All authors declare no conflicts of interest related to  
342 this study.

343

344 **References:**

- 345 1. Leasher JL, Bourne RR, Flaxman SR, et al. Global Estimates on the Number of  
346 People Blind or Visually Impaired by Diabetic Retinopathy: A Meta-analysis  
347 From 1990 to 2010. *Diabetes Care* 2016;39:1643-1649.
- 348 2. Stitt AW, Curtis TM, Chen M, et al. The progress in understanding and treatment  
349 of diabetic retinopathy. *Prog Retin Eye Res* 2016;51:156-186.
- 350 3. Holden BA, Fricke TR, Wilson DA, et al. Global Prevalence of Myopia and High  
351 Myopia and Temporal Trends from 2000 through 2050. *Ophthalmology*  
352 2016;123:1036-1042.
- 353 4. Fu Y, Geng D, Liu H, Che H. Myopia and/or longer axial length are protective  
354 against diabetic retinopathy: A meta-analysis. *Acta Ophthalmol* 2016;94:346-352.
- 355 5. Wang X, Tang L, Gao L, Yang Y, Cao D, Li Y. Myopia and diabetic retinopathy:  
356 A systematic review and meta-analysis. *Diabetes Res Clin Pract* 2016;111:1-9.
- 357 6. Man R, Gan A, Gupta P, et al. Is myopia associated with the incidence and  
358 progression of diabetic retinopathy? *Am J Ophthalmol* 2019;208:226-233.
- 359 7. Bikbov MM, Kazakbaeva GM, Gilmanshin TR, et al. Axial length and its  
360 associations in a Russian population: The Ural Eye and Medical Study. *Plos One*  
361 2019;14:e211186.
- 362 8. Wang Q, Wang YX, Wu SL, et al. Ocular axial length and diabetic retinopathy:  
363 The kailuan eye study. *Invest Ophthalmol Vis Sci* 2019;60:3689-3695.
- 364 9. He J, Xu X, Zhu J, et al. Lens power, axial Length-to-Corneal radius ratio, and  
365 association with diabetic retinopathy in the adult population with type 2 diabetes.  
366 *Ophthalmology* 2017;124:326-335.
- 367 10. Chao DL, Lin SC, Chen R, Lin SC. Myopia is inversely associated with the  
368 prevalence of diabetic retinopathy in the south korean population. *Am J*  
369 *Ophthalmol* 2016;172:39-44.
- 370 11. Xu L, Cao WF, Wang YX, Chen CX, Jonas JB. Anterior chamber depth and  
371 chamber angle and their associations with ocular and general parameters: The  
372 Beijing Eye Study. *Am J Ophthalmol* 2008;145:929-936.
- 373 12. Hong T, Mitchell P, de Loryn T, Rochtchina E, Cugati S, Wang JJ. Development

- 374 and progression of diabetic retinopathy 12 months after phacoemulsification  
375 cataract surgery. *Ophthalmology* 2009;116:1510-1514.
- 376 13. Flitcroft DI, He M, Jonas JB, et al. IMI - defining and classifying myopia: A  
377 proposed set of standards for clinical and epidemiologic studies. *Invest*  
378 *Ophthalmol Vis Sci* 2019;60:M20-M30.
- 379 14. Rozema JJ, Atchison DA, Tassignon MJ. Comparing methods to estimate the  
380 human lens power. *Invest Ophthalmol Vis Sci* 2011;52:7937-7942.
- 381 15. Wilkinson CP, Ferris FR, Klein RE, et al. Proposed international clinical diabetic  
382 retinopathy and diabetic macular edema disease severity scales. *Ophthalmology*  
383 2003;110:1677-1682.
- 384 16. Yau JW, Rogers SL, Kawasaki R, et al. Global prevalence and major risk factors  
385 of diabetic retinopathy. *Diabetes Care* 2012;35:556-564.
- 386 17. Morgan IG, Ohno-Matsui K, Saw SM. Myopia. *Lancet* 2012;379:1739-1748.
- 387 18. Moss SE, Klein R, Klein BE. Ocular factors in the incidence and progression of  
388 diabetic retinopathy. *Ophthalmology* 1994;101:77-83.
- 389 19. Dogru M, Inoue M, Nakamura M, Yamamoto M. Modifying factors related to  
390 asymmetric diabetic retinopathy. *Eye (Lond)* 1998;12 ( Pt 6):929-933.
- 391 20. Bazzazi N, Akbarzadeh S, Yavarikia M, Poorolajal J, Fouladi DF. HIGH  
392 MYOPIA and DIABETIC RETINOPATHY: A contralateral eye study in diabetic  
393 patients with high myopic anisometropia. *Retina* 2017;37:1270-1276.
- 394 21. Pan CW, Cheung CY, Aung T, et al. Differential associations of myopia with  
395 major age-related eye diseases: The Singapore Indian Eye Study. *Ophthalmology*  
396 2013;120:284-291.
- 397 22. Lim LS, Lamoureux E, Saw SM, Tay WT, Mitchell P, Wong TY. Are myopic  
398 eyes less likely to have diabetic retinopathy? *Ophthalmology* 2010;117:524-530.
- 399 23. Tan N, Tham YC, Ding Y, et al. Associations of peripapillary atrophy and fundus  
400 tessellation with diabetic retinopathy. *Ophthalmol Retina* 2018;2:574-581.
- 401 24. Flores-Moreno I, Lugo F, Duker JS, Ruiz-Moreno JM. The relationship between  
402 axial length and choroidal thickness in eyes with high myopia. *Am J Ophthalmol*  
403 2013;155:314-319.

- 404 25. Man RE, Lamoureux EL, Taouk Y, et al. Axial length, retinal function, and  
405 oxygen consumption: A potential mechanism for a lower risk of diabetic  
406 retinopathy in longer eyes. *Invest Ophthalmol Vis Sci* 2013;54:7691-7698.
- 407 26. Fang Y, Du R, Nagaoka N, et al. OCT-Based diagnostic criteria for different  
408 stages of myopic maculopathy. *Ophthalmology* 2019;126:1018-1032.
- 409 27. Chen W, Song H, Xie S, Han Q, Tang X, Chu Y. Correlation of macular  
410 choroidal thickness with concentrations of aqueous vascular endothelial growth  
411 factor in high myopia. *Curr Eye Res* 2015;40:307-313.
- 412 28. Pierro L, Brancato R, Zaganelli E, Guarisco L, Calori G. Correlation of lens  
413 thickness with blood glucose control in diabetes mellitus. *Acta Ophthalmol Scand*  
414 1996;74:539-541.
- 415 29. Wiemer NG, Dubbelman M, Kostense PJ, Ringens PJ, Polak BC. The influence  
416 of diabetes mellitus type 1 and 2 on the thickness, shape, and equivalent  
417 refractive index of the human crystalline lens. *Ophthalmology*  
418 2008;115:1679-1686.
- 419  
420  
421

422 **Table legends**

423 **Table 1.** Demographic and clinical features of the included patients with type 2 diabetes mellitus.

|                                    | <b>Overall</b> | <b>Non-DR</b> | <b>Any-DR</b> | <b>P-value</b>   |
|------------------------------------|----------------|---------------|---------------|------------------|
| No. of subjects                    | 1838           | 1455(79.2%)   | 383(20.8%)    | -                |
| Gender                             |                |               |               | <b>0.001</b>     |
| Male                               | 784(57.3%)     | 591(40.6%)    | 193(50.4%)    |                  |
| Female                             | 1054(42.7%)    | 864(59.4%)    | 190(49.6%)    |                  |
| Mean age, year                     | 64.5±7.9       | 64.6±8.0      | 64.1±7.9      | 0.239            |
| Duration of diabetes, year         | 9.0±7.0        | 8.3±6.7       | 11.7±7.5      | <b>&lt;0.001</b> |
| HbA1c, %                           | 7.0±1.4        | 6.8±1.3       | 7.7±1.7       | <b>&lt;0.001</b> |
| Body mass index, kg/m <sup>2</sup> | 24.7±3.3       | 24.7±3.3      | 24.5±3.2      | 0.306            |
| Mean BP, mmHg                      | 182.1±23.6     | 180.7±23.2    | 187.3±24.2    | <b>&lt;0.001</b> |
| Total cholesterol, mmol/L          | 4.8±1.0        | 4.8±1.0       | 4.8±1.1       | 0.548            |
| Triglycerides, mmol/L              | 2.3±1.6        | 2.3±1.6       | 2.3±1.7       | 0.630            |
| Serum creatinine, µmol/L           | 72.9±22.7      | 71.4±20.1     | 78.6±30.1     | <b>&lt;0.001</b> |
| Serum uric acid, µmol/L            | 367.4±97.6     | 367.6±96.4    | 366.7±102.2   | 0.866            |
| Spherical equivalent, D            | 0.1±4.5        | -0.04±2.7     | 0.1±2.4       | 0.247            |
| CCT, µm                            | 546.8±31.7     | 546.4±31.7    | 548.1±31.7    | 0.345            |
| Corneal diameter, mm               | 11.6±0.4       | 11.6±0.4      | 11.6±0.4      | 0.269            |
| Corneal curvature, D               | 44.2±1.5       | 44.2±1.5      | 44.2±1.5      | 0.733            |
| Axial length, mm                   | 23.6±1.2       | 23.6±1.2      | 23.4±1.2      | <b>0.006</b>     |
| ACD, mm                            | 2.4±0.4        | 2.4±0.4       | 2.4±0.4       | 0.199            |
| Len thickness, mm                  | 4.7±0.3        | 4.7±0.3       | 4.7±0.4       | 0.112            |
| Lens power, D                      | -144.3±30.9    | -143.4±31.8   | -147.9±26.7   | <b>0.014</b>     |
| AL/CR ratio                        | 3.08±0.14      | 3.09±0.15     | 3.07±0.13     | <b>0.005</b>     |

424 Data were presented as mean ± standard deviation (SD).

425 DR=diabetic retinopathy; BP=blood pressure; CCT=central corneal thickness; ACD=anterior

426 chamber depth; AL/CR ratio=axial length-to-corneal radius ratio.

427 Bold indicates statistical significance.



428 **Table 2.** Correlation coefficients between ocular components and HbA1c levels.

|                                 |                                 |                                 |                                 |                                 |                                 |                                 |                                |                       |              |
|---------------------------------|---------------------------------|---------------------------------|---------------------------------|---------------------------------|---------------------------------|---------------------------------|--------------------------------|-----------------------|--------------|
| <b>SE</b>                       |                                 |                                 |                                 |                                 |                                 |                                 |                                |                       |              |
| r=-0.0359<br>P=0.1305           | <b>CCT</b>                      |                                 |                                 |                                 |                                 |                                 |                                |                       |              |
| r=-0.0422<br>P=0.0758           | r=-0.0011<br>P=0.9619           | <b>Corneal diameter</b>         |                                 |                                 |                                 |                                 |                                |                       |              |
| r=-0.0276<br>P=0.2451           | r=-0.1608*<br><b>P&lt;0.001</b> | r=-0.4953*<br><b>P&lt;0.001</b> | <b>Corneal curvature</b>        |                                 |                                 |                                 |                                |                       |              |
| r=-0.4493*<br><b>P&lt;0.001</b> | r=0.0889*<br><b>P&lt;0.0012</b> | r=0.3880*<br><b>P&lt;0.001</b>  | r=-0.4577*<br><b>P&lt;0.001</b> | <b>AL</b>                       |                                 |                                 |                                |                       |              |
| r=-0.1722*<br><b>P&lt;0.001</b> | r=-0.0606*<br><b>P=0.0098</b>   | r=0.3090*<br><b>P&lt;0.001</b>  | r=-0.0076<br>P=0.7477           | r=0.3882*<br><b>P&lt;0.001</b>  | <b>ACD</b>                      |                                 |                                |                       |              |
| r=0.1266*<br><b>P&lt;0.001</b>  | r=-0.0017<br>P=0.9417           | r=-0.0396<br>P=0.0949           | r=-0.0346<br>P=0.1443           | r=-0.1752*<br><b>P&lt;0.001</b> | r=-0.5890*<br><b>P&lt;0.001</b> | <b>Len thickness</b>            |                                |                       |              |
| r=0.5889*<br><b>P&lt;0.001</b>  | r=-0.1205*<br><b>P&lt;0.001</b> | r=0.1244*<br><b>P&lt;0.001</b>  | r=0.1183*<br><b>P&lt;0.001</b>  | r=0.0151<br>P=0.5264            | r=0.4523*<br><b>P&lt;0.001</b>  | r=-0.1624*<br><b>P&lt;0.001</b> | <b>Lens power</b>              |                       |              |
| r=-0.5101*<br><b>P&lt;0.001</b> | r=-0.0207<br>P=0.379            | r=0.0648*<br><b>P=0.0058</b>    | r=0.2204*<br><b>P&lt;0.001</b>  | r=0.7656*<br><b>P&lt;0.001</b>  | r=0.4199*<br><b>P&lt;0.001</b>  | r=-0.2167*<br><b>P&lt;0.001</b> | r=0.1048*<br><b>P&lt;0.001</b> | <b>AL/CR ratio</b>    |              |
| r=-0.021<br>P=0.3777            | r=0.0839*<br><b>P&lt;0.0014</b> | r=-0.0062<br>P=0.7925           | r=-0.0022<br>P=0.9254           | r=-0.0325<br>P=0.1676           | r=0.0028<br>P=0.9053            | r=-0.0249<br>P=0.2954           | r=-0.0669*<br><b>P=0.0051</b>  | r=-0.0366<br>P=0.1209 | <b>HbA1c</b> |

429 \*Bold indicates statistical significance.

430 SE=spherical equivalent; CCT=central corneal thickness; AL=axial length; ACD=anterior chamber depth; AL/CR ratio=axial length to corneal  
 431 curvature ratio.

432

433 **Table 3.** Associations of ocular biometry and diabetic retinopathy after adjusted for  
 434 age and sex.

| Age and sex adjusted    | Any DR             |                  | VTDR               |                  |
|-------------------------|--------------------|------------------|--------------------|------------------|
|                         | OR (95%CI)         | P-value          | OR (95%CI)         | P-value          |
| Axial length, mm        | 0.82 (0.73, 0.91)  | <b>&lt;0.001</b> | 0.65 (0.52, 0.81)  | <b>&lt;0.001</b> |
| Corneal curvature, D    | 1.05 (0.97, 1.14)  | 0.238            | 1.04 (0.91, 1.19)  | 0.571            |
| ACD, mm                 | 0.73 (0.53, 1.00)  | 0.052            | 0.49 (0.26, 0.92)  | 0.027            |
| Len thickness, mm       | 1.52 (1.06, 2.18)  | <b>0.024</b>     | 2.42 (1.27, 4.63)  | <b>0.007</b>     |
| Lens power, D           | 0.99 (0.99, 1.00)  | <b>0.003</b>     | 0.99 (0.98, 1.00)  | <b>0.001</b>     |
| AL/CR ratio             | 0.24 (0.10, 0.61)  | <b>0.003</b>     | 0.03 (0.00, 0.20)  | <b>&lt;0.001</b> |
| Spherical equivalent, D | 1.04 (0.99, 1.09)  | 0.160            | 1.09 (0.99, 1.21)  | 0.080            |
| Corneal diameter, mm    | 0.75 (0.57, 0.99)  | <b>0.041</b>     | 0.64 (0.39, 1.03)  | 0.068            |
| CCT, $\mu$ m            | 1.00 (0.997, 1.00) | 0.760            | 1.00 (0.996, 1.01) | 0.388            |
| Refractive status       |                    |                  |                    |                  |
| Emmetropia              | Ref                |                  | Ref                |                  |
| Hyperopia               | 1.01 (0.69, 1.47)  | 0.976            | 0.89 (0.46, 1.72)  | 0.736            |
| Mild myopia             | 0.80 (0.45, 1.44)  | 0.456            | 0.46 (0.15, 1.44)  | 0.182            |
| Moderate myopia         | 0.86 (0.42, 1.76)  | 0.676            | 0.49 (0.11, 2.21)  | 0.351            |
| High myopia             | 1.07 (0.76, 1.51)  | 0.710            | 1.20 (0.66, 2.19)  | 0.542            |

435 DR=diabetic retinopathy; VTDR=vision threatened DR; OR=odds ratio; 95%CI=95%  
 436 confidential interval; ACD=anterior chamber depth; CCT=central corneal thickness;  
 437 AL/CR ratio=axial length to corneal curvature ratio.

438 Bold indicates statistical significance.

439

440

441 **Table 4.** Multivariable adjusted models to evaluate the associations of ocular  
 442 biometry and diabetic retinopathy.

| Multivariable adjusted*  | Any DR                 |                  | VTDR               |              |
|--------------------------|------------------------|------------------|--------------------|--------------|
|                          | OR (95%CI)             | P-value          | OR (95%CI)         | P-value      |
| <b>AL</b>                |                        |                  |                    |              |
| Quantile 1               | 1.00 (Ref)             |                  | 1.00 (Ref)         |              |
| Quantile 2               | 0.84 (0.60, 1.18)      | 0.324            | 0.83 (0.47, 1.45)  | 0.513        |
| Quantile 3               | 0.54 (0.38, 0.78)      | <b>0.001</b>     | 0.73 (0.41, 1.30)  | 0.280        |
| Quantile 4               | 0.49 (0.33, 0.70)      | <b>&lt;0.001</b> | 0.35 (0.18, 0.68)  | <b>0.002</b> |
| Per 1-mm increase        | 0.84 (0.74, 0.94)      | <b>0.003</b>     | 0.67 (0.54, 0.85)  | <b>0.001</b> |
| <b>Corneal curvature</b> |                        |                  |                    |              |
| Quantile 1               | 1.00 (Ref)             |                  | 1.00 (Ref)         |              |
| Quantile 2               | 1.21 (0.85, 1.71)      | 0.293            | 0.91 (0.51, 1.61)  | 0.744        |
| Quantile 3               | 1.32 (0.93, 1.88)      | 0.126            | 0.98 (0.55, 1.76)  | 0.943        |
| Quantile 4               | 1.17 (0.81, 1.69)      | 0.393            | 0.96 (0.53, 1.74)  | 0.883        |
| Per 1-D increase         | 1.03 (0.95, 1.12)      | 0.466            | 1.02 (0.89, 1.17)  | 0.783        |
| <b>ACD</b>               |                        |                  |                    |              |
| Quantile 1               | 1.00 (Ref)             |                  | 1.00 (Ref)         |              |
| Quantile 2               | 0.58 (0.41, 0.82)      | <b>0.002</b>     | 0.62 (0.35, 1.12)  | 0.112        |
| Quantile 3               | 0.65 (0.46, 0.92)      | <b>0.016</b>     | 0.74 (0.42, 1.31)  | 0.302        |
| Quantile 4               | 0.58 (0.40, 0.83)      | <b>0.003</b>     | 0.36 (0.18, 0.71)  | <b>0.003</b> |
| Per 1-mm increase        | 0.79 (0.56, 1.10)      | 0.158            | 0.56 (0.29, 1.07)  | 0.080        |
| <b>Lens thickness</b>    |                        |                  |                    |              |
| Quantile 1               | 1.00 (Ref)             |                  |                    |              |
| Quantile 2               | 1.14 (0.79, 1.64)      | 0.483            | 2.03 (1.10, 3.75)  | 0.023        |
| Quantile 3               | 0.92 (0.62, 1.35)      | 0.661            | 1.37 (0.68, 2.74)  | 0.378        |
| Quantile 4               | 1.31 (0.90, 1.92)      | 0.161            | 1.81 (0.90, 3.62)  | 0.096        |
| Per 1-mm increase        | 1.32 (0.89, 1.95)      | 0.168            | 2.03 (1.04, 3.97)  | 0.039        |
| <b>Lens power</b>        |                        |                  |                    |              |
| Quantile 1               | 1.00 (Ref)             |                  |                    |              |
| Quantile 2               | 0.87 (0.61, 1.23)      | 0.418            | 0.71 (0.41, 1.24)  | 0.230        |
| Quantile 3               | 0.78 (0.55, 1.11)      | 0.174            | 0.53 (0.29, 0.97)  | <b>0.039</b> |
| Quantile 4               | 0.66 (0.45, 0.96)      | <b>0.031</b>     | 0.50 (0.26, 0.95)  | <b>0.033</b> |
| Per 1-D increase         | 0.9951(0.9904, 0.9998) | <b>0.042</b>     | 0.99 (0.98, 0.997) | <b>0.007</b> |
| <b>AL/CR ratio</b>       |                        |                  |                    |              |
| Quantile 1               | 1.00 (Ref)             |                  |                    |              |
| Quantile 2               | 0.84 (0.60, 1.18)      | 0.309            | 0.61 (0.35, 1.06)  | 0.079        |
| Quantile 3               | 0.62 (0.44, 0.89)      | <b>0.009</b>     | 0.59 (0.34, 1.04)  | <b>0.070</b> |
| Quantile 4               | 0.65 (0.46, 0.92)      | <b>0.017</b>     | 0.35 (0.19, 0.66)  | <b>0.001</b> |

|                          |                   |              |                   |              |
|--------------------------|-------------------|--------------|-------------------|--------------|
| Per 1 increase           | 0.26 (0.10, 0.70) | <b>0.007</b> | 0.04 (0.01, 0.25) | <b>0.001</b> |
| <b>Refractive status</b> |                   |              |                   |              |
| Emmetropia               | 1.00 (Ref)        |              |                   |              |
| Hyperopia                | 1.13 (0.75, 1.71) | 0.556        | 1.04 (0.52, 2.07) | 0.913        |
| Mild myopia              | 0.75 (0.40, 1.42) | 0.379        | 0.48 (0.15, 1.54) | 0.218        |
| Moderate myopia          | 0.87 (0.40, 1.89) | 0.730        | 0.48 (0.10, 2.27) | 0.358        |
| High myopia              | 1.14 (0.78, 1.66) | 0.510        | 1.27 (0.67, 2.39) | 0.462        |
| Per 1-D increase         | 1.04 (0.99, 1.10) | 0.133        | 1.10 (0.99, 1.23) | 0.064        |
| <b>Corneal diameter</b>  |                   |              |                   |              |
| Quantile 1               | 1.00 (Ref)        |              |                   |              |
| Quantile 2               | 1.27 (0.90, 1.80) | 0.175        | 0.79 (0.44, 1.42) | 0.430        |
| Quantile 3               | 1.00 (0.70, 1.44) | 0.991        | 0.92 (0.52, 1.64) | 0.778        |
| Quantile 4               | 0.92 (0.64, 1.33) | 0.670        | 0.68 (0.37, 1.24) | 0.211        |
| Per 1-mm increase        | 0.82 (0.60, 1.11) | 0.205        | 0.72 (0.44, 1.20) | 0.207        |

443 \*Adjusted for age, sex, duration of diabetes mellitus, HbA1c, total cholesterol, serum  
 444 creatinine, serum uric acid, body mass index (BMI), and mean blood pressure.

445 DR=diabetic retinopathy; VTDR=vision threatened DR; OR=odds ratio; 95%CI=95%  
 446 confidential interval; ACD=anterior chamber depth; CCT=central corneal thickness;  
 447 AL/CR ratio=axial length to corneal curvature ratio.

448 Bold indicates statistical significance.

449

450

451

452

### **Figure legend**

**Figure 1.** Graph showing the odds ratios for any diabetic retinopathy (DR) and vision threatened DR (VTDR) according to axial length. Data were fitted using a Logistic regression model adjusting for age, sex, duration of diabetes mellitus, HbA1c, total cholesterol, serum creatinine, serum uric acid, BMI, and mean blood pressure. AL was modeled using restricted cubic splines (solid line is the point estimate and dashed lines are 95% confidence limits) with 5 knots at 5%, 27.5%, 50%, 72.55, and 95% percentiles of AL distribution. The reference value is 24.0 mm.

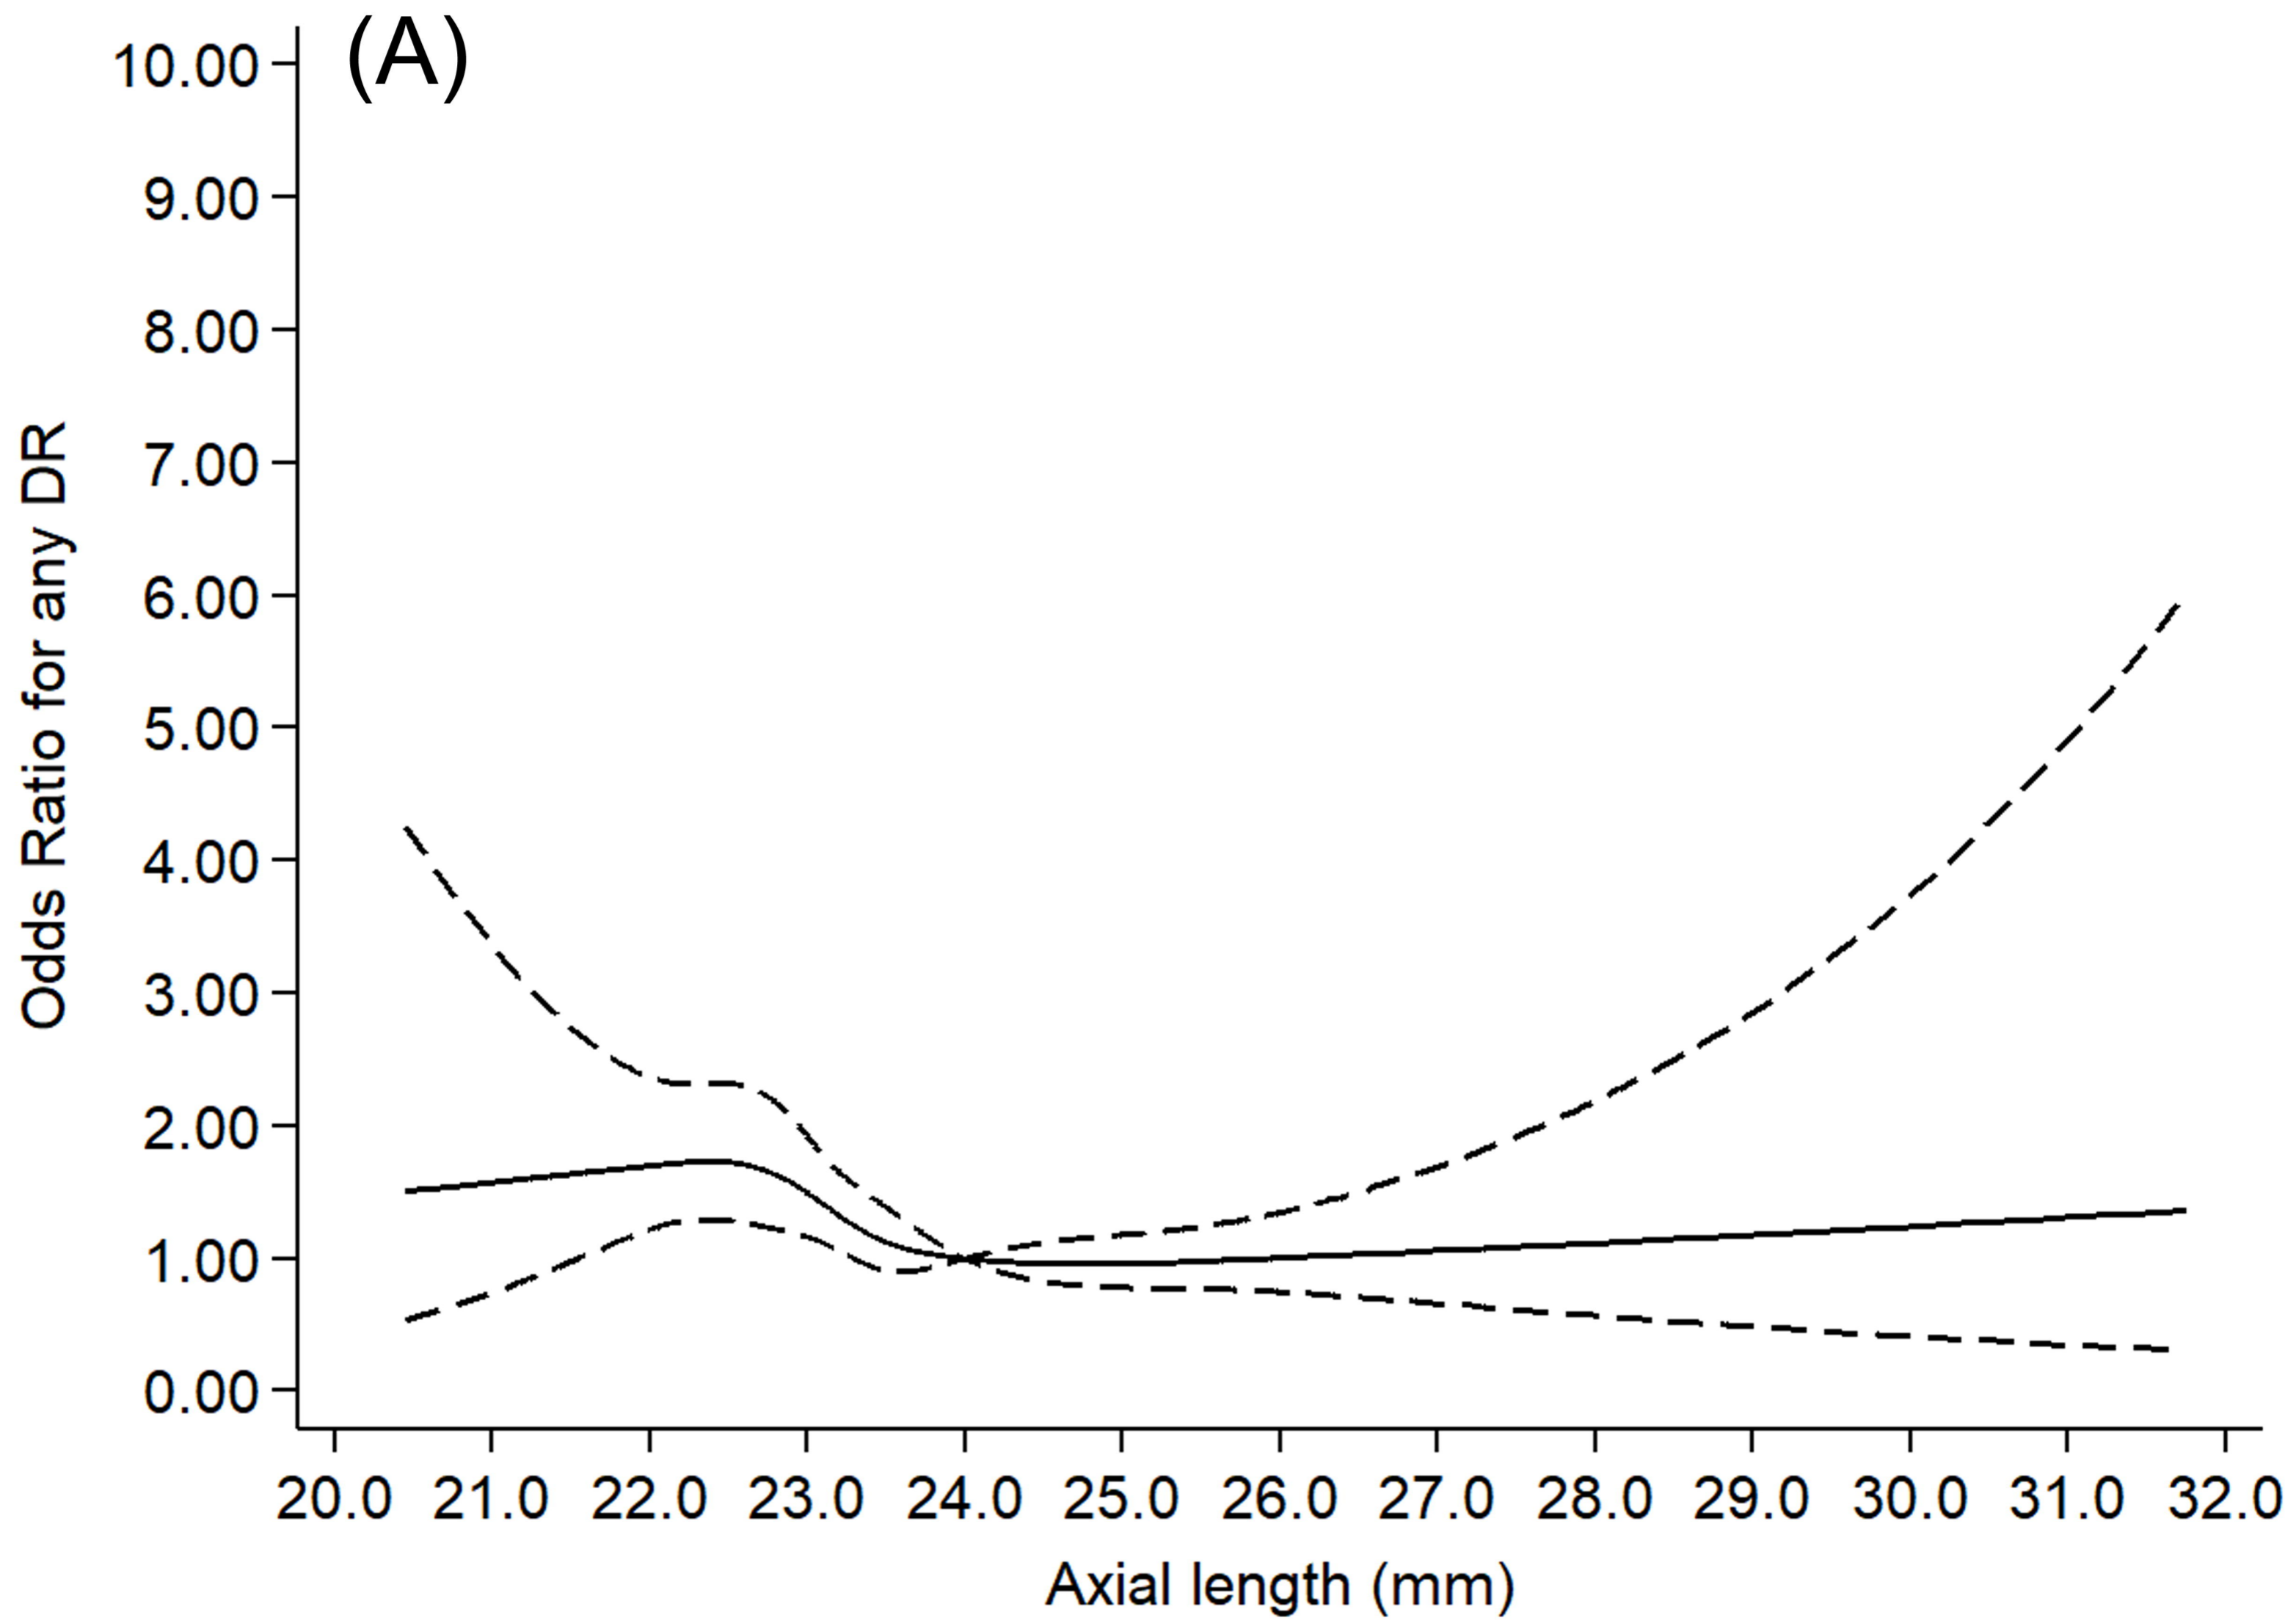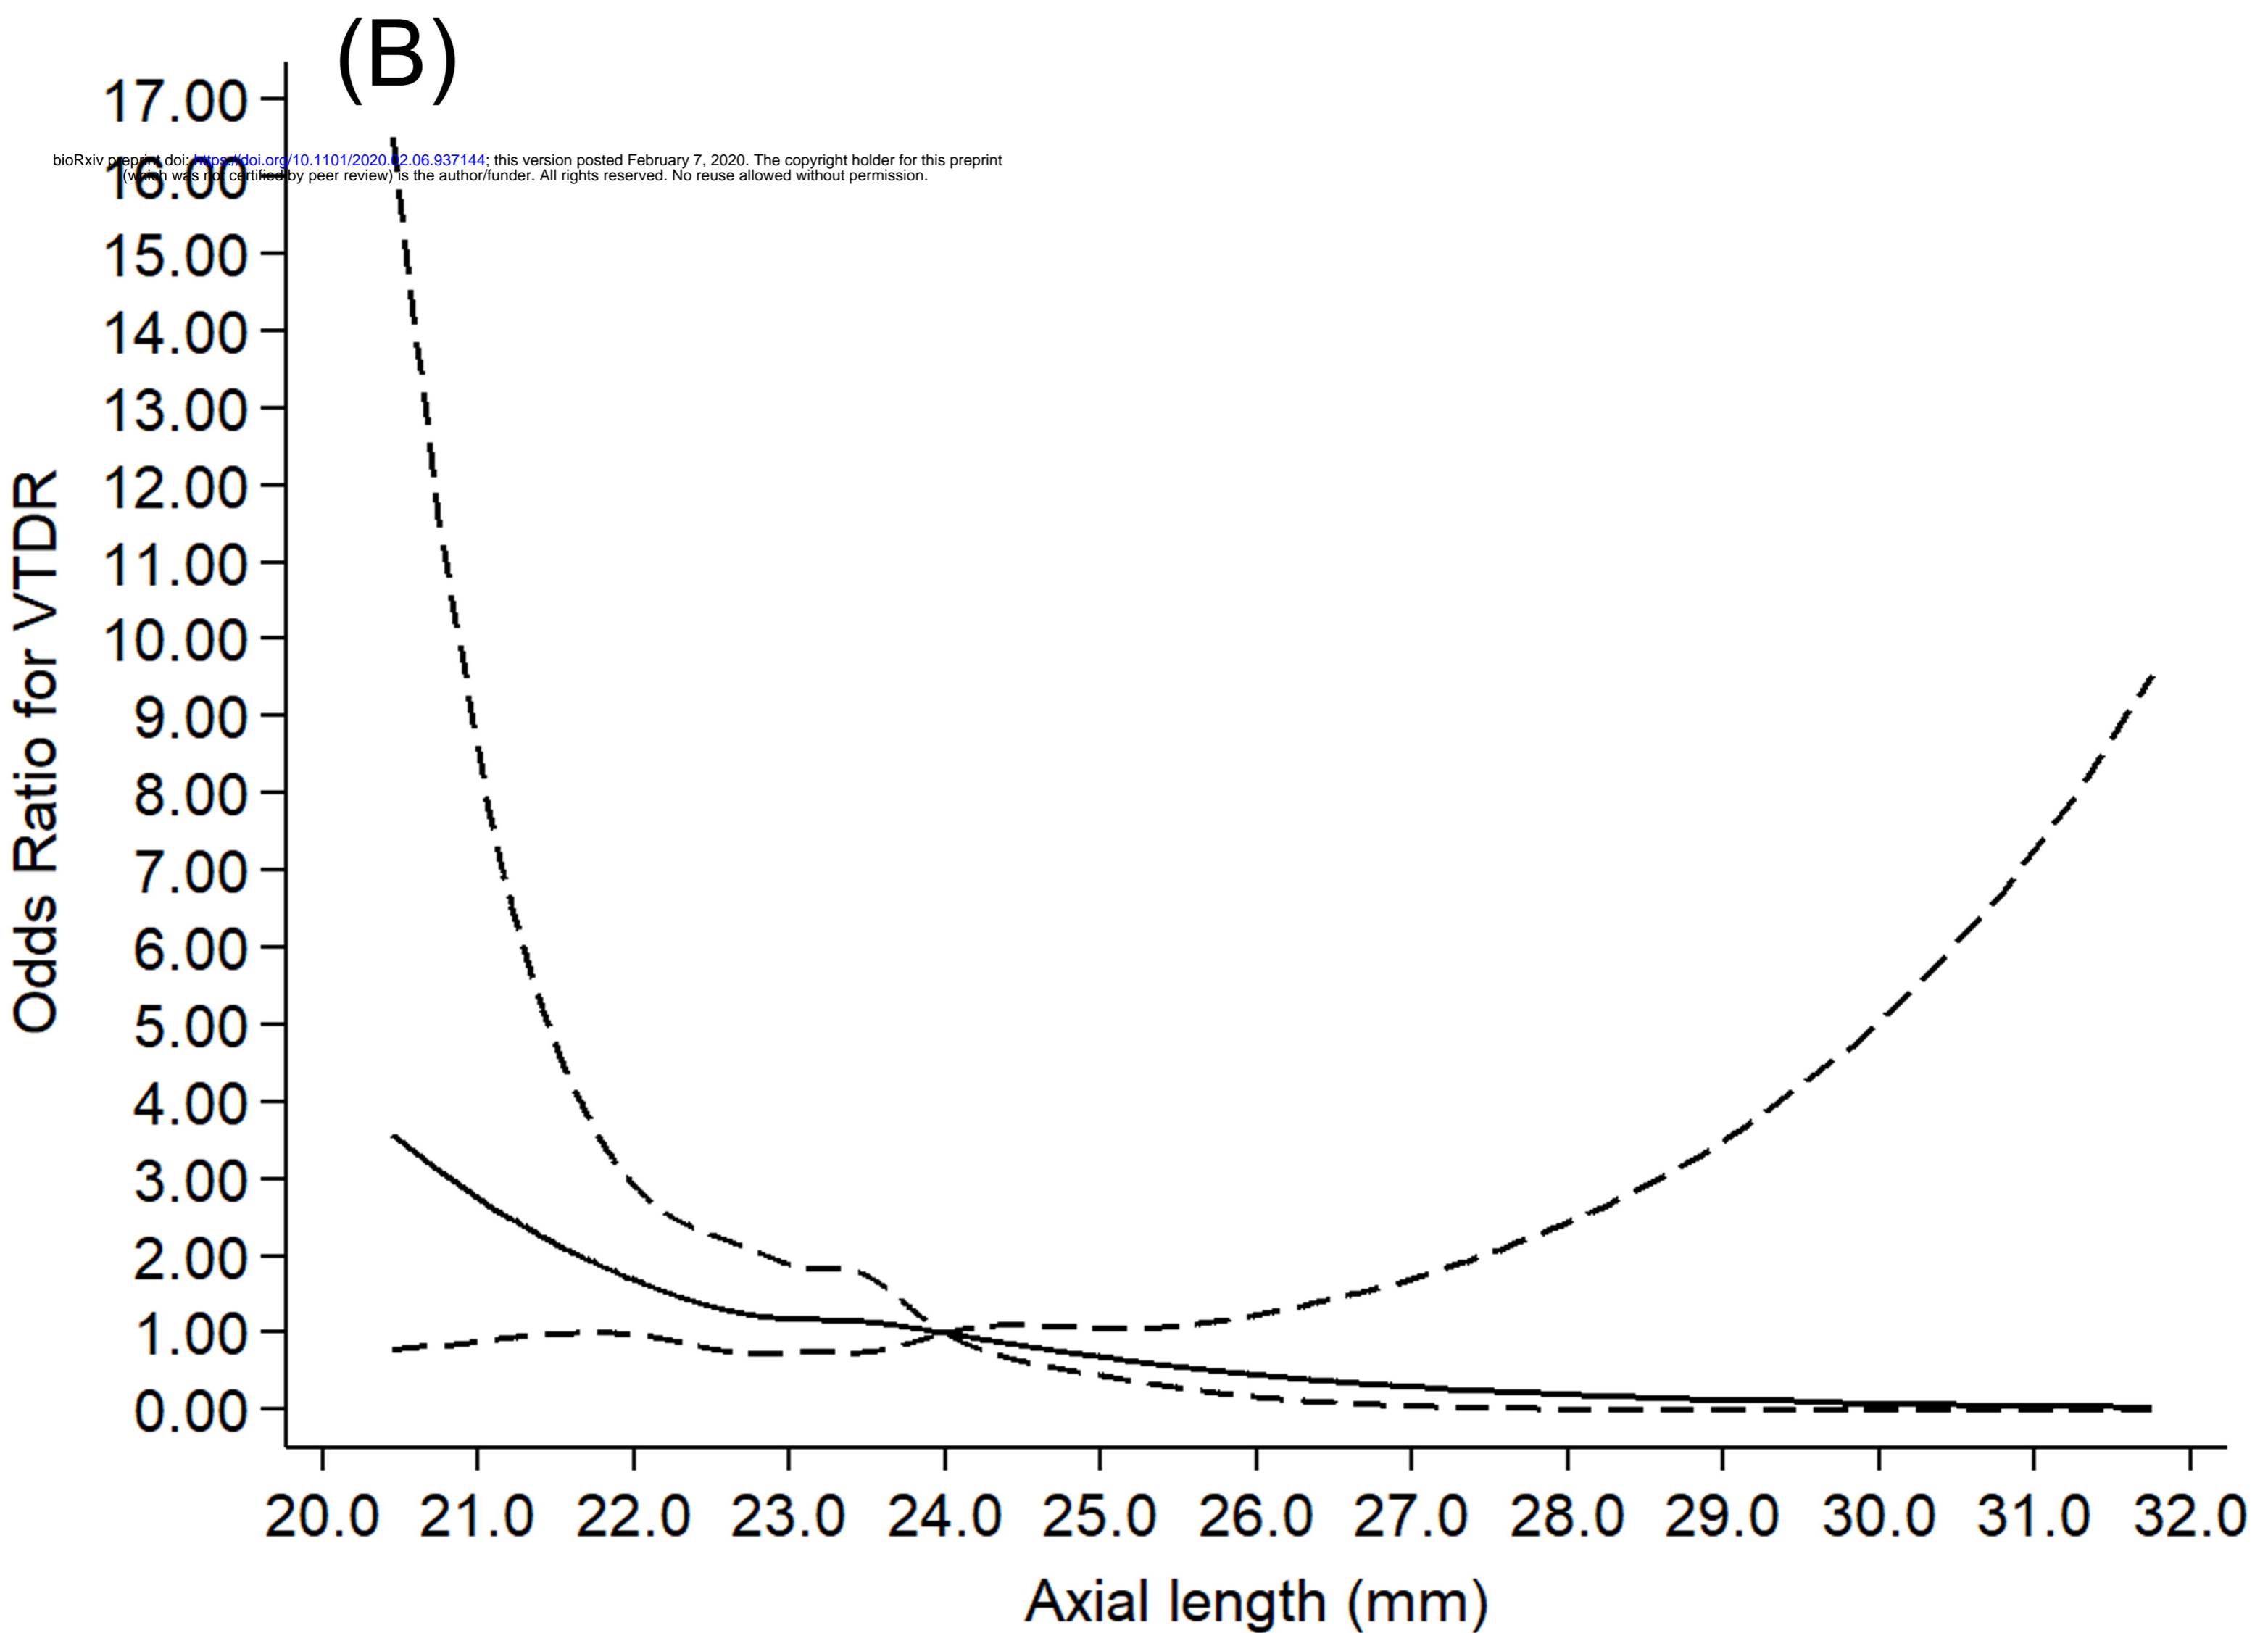

bioRxiv preprint doi: <https://doi.org/10.1101/2020.02.06.937144>; this version posted February 7, 2020. The copyright holder for this preprint (which was not certified by peer review) is the author/funder. All rights reserved. No reuse allowed without permission.
